# Supplementary material for: The Masters athlete in Olympic weightlifting: Training, lifestyle, health challenges, and gender differences
Source: PubMed Central journal article supplement (PMC7717526; doi:10.1371/journal.pone.0243652), 2020-12-04
Supplement: pone.0243652.s005.pdf [file pone.0243652.s005.pdf]

# Survey for Master Weightlifters

## Demographics

What is the gender that you identify with?

- Male
- Female
- Transgender
- Intersex
- Other (Please specify) \_\_\_\_\_

What is your date of birth (Please fill in the format of MM/DD/YYYY)?

\_\_\_\_\_

Are you Hispanic or Latinx?

- No
- Yes

What is your racial identity/identities? Click all that apply.

- White/Caucasian
- Black or African American
- American Indian or Alaska Native
- Asian
- Native Hawaiian or Pacific Islander
- Other (Please specify) \_\_\_\_\_

What is your highest level of education you completed?

- Not graduated from high school
- High school or GED
- Some college
- College degree
- Some graduate school
- Graduate school

What is your marital status?

- Unmarried
- Married
- Separated
- Divorced
- Widowed

What is your employment status?

- Retired
- Unemployed/Not working
- Part-time employed
- Full-time employed

**What is your employment status?**

- Retired
- Unemployed/Not working
- Part-time employed
- Full-time employed

**What is your annual household income last year?**

- \$15,000 to \$24,999
- \$25,000 to \$34,999
- \$35,000 to \$49,999
- \$50,000 to \$74,999
- \$75,000 to \$99,999
- \$100,000 to 149,999
- \$150,000 to \$199,999
- \$200,000 and over
- Decline to answer

**Sports background and participation/Weightlifting**

**What was your approximate age when you**

|                                                            | Age |
|------------------------------------------------------------|-----|
| Started strength training using weights on a regular basis |     |
| Started training in Olympic Weightlifting                  |     |

**In which year did you first compete in a sanctioned weightlifting meet? If unsure, give an approximate year.**

\_\_\_\_\_

**How many different coaches have you had over your weightlifting career (coaches who specifically worked with you specifically on your lifts, e.g. USAW coaches, Crossfit coaches, personal trainers)?**

- Coach
- 1 Coach
- 2 Coaches
- 3 Coaches
- More than 3 coaches (Please specify number) \_\_\_\_\_

**Are you currently working with a weightlifting coach?**

- No
- Yes

**If No is selected skip to question "What program(s) do you follow in your weightlifting training?"**

**How do you work with your current coach?**

- In person
- Remotely
- Both

**How frequently does your current coach provide feedback on your weightlifting?**

- Weekly or more often
- Several times each month
- Once a month
- Less frequent than once a month

**What program(s) do you follow in your weightlifting training?**

- The program assigned by my coach(s)
- Paid subscription program
- A program from a website or a book
- My own program
- No systematic program
- Other (Please specify) \_\_\_\_\_

**What is your competition experience with sports other than weightlifting? Please check all that apply.**

|                                    | Competed in the past |              |       | Competed in the past |              |       |
|------------------------------------|----------------------|--------------|-------|----------------------|--------------|-------|
|                                    | Never                | Occasionally | Often | Never                | Occasionally | Often |
| Crossfit                           | Never                | Occasionally | Often | Never                | Occasionally | Often |
| Cardio (Running /Swimming/Cycling) | Never                | Occasionally | Often | Never                | Occasionally | Often |
| Ball Sports                        | Never                | Occasionally | Often | Never                | Occasionally | Often |
| Gymnastics / Cheer leading         | Never                | Occasionally | Often | Never                | Occasionally | Often |
| Martial Arts/Wrestling/ Boxing     | Never                | Occasionally | Often | Never                | Occasionally | Often |
| Track and field                    | Never                | Occasionally | Often | Never                | Occasionally | Often |
| Powerlifting                       | Never                | Occasionally | Often | Never                | Occasionally | Often |
| Skiing/Snowboarding/Skating        | Never                | Occasionally | Often | Never                | Occasionally | Often |
| Other (Please specify)             | Never                | Occasionally | Often | Never                | Occasionally | Often |

**Currently in a typical week on how many days do you engage in the following physical activities?**

|                                    | 0 day                 | 1 day                 | 2 day                 | 3 day                 | 4 day                 | 5 day                 | 6 day                 | 7 day                 |
|------------------------------------|-----------------------|-----------------------|-----------------------|-----------------------|-----------------------|-----------------------|-----------------------|-----------------------|
| Weightlifting                      | <input type="radio"/> | <input type="radio"/> | <input type="radio"/> | <input type="radio"/> | <input type="radio"/> | <input type="radio"/> | <input type="radio"/> | <input type="radio"/> |
| Crossfit                           | <input type="radio"/> | <input type="radio"/> | <input type="radio"/> | <input type="radio"/> | <input type="radio"/> | <input type="radio"/> | <input type="radio"/> | <input type="radio"/> |
| Cardio (Running /Swimming/Cycling) | <input type="radio"/> | <input type="radio"/> | <input type="radio"/> | <input type="radio"/> | <input type="radio"/> | <input type="radio"/> | <input type="radio"/> | <input type="radio"/> |
| Ball Sports                        | <input type="radio"/> | <input type="radio"/> | <input type="radio"/> | <input type="radio"/> | <input type="radio"/> | <input type="radio"/> | <input type="radio"/> | <input type="radio"/> |
| Gymnastics / Cheer leading         | <input type="radio"/> | <input type="radio"/> | <input type="radio"/> | <input type="radio"/> | <input type="radio"/> | <input type="radio"/> | <input type="radio"/> | <input type="radio"/> |
| Martial Arts/Wrestling/ Boxing     | <input type="radio"/> | <input type="radio"/> | <input type="radio"/> | <input type="radio"/> | <input type="radio"/> | <input type="radio"/> | <input type="radio"/> | <input type="radio"/> |
| Track and field                    | <input type="radio"/> | <input type="radio"/> | <input type="radio"/> | <input type="radio"/> | <input type="radio"/> | <input type="radio"/> | <input type="radio"/> | <input type="radio"/> |
| Walking                            | <input type="radio"/> | <input type="radio"/> | <input type="radio"/> | <input type="radio"/> | <input type="radio"/> | <input type="radio"/> | <input type="radio"/> | <input type="radio"/> |
| Yoga/Pilates                       | <input type="radio"/> | <input type="radio"/> | <input type="radio"/> | <input type="radio"/> | <input type="radio"/> | <input type="radio"/> | <input type="radio"/> | <input type="radio"/> |
| Other sport (Please specify)       | <input type="radio"/> | <input type="radio"/> | <input type="radio"/> | <input type="radio"/> | <input type="radio"/> | <input type="radio"/> | <input type="radio"/> | <input type="radio"/> |

**Training schedule and Location**

Currently how long does a typical weightlifting training session last for you?

- Less than 1 hour
- About 1 hour
- 1 to 1.5 hours
- 1.5 to 2 hours
- 2 hours or longer

Where do you typically train for weightlifting (Check all that apply)?

- Weightlifting gym
- Crossfit gym
- Fitness center
- Home/garage gym
- Other (Please specify) \_\_\_\_\_

**Health/Mobility/other factors affecting weightlifting training and performance**

In the past two years, overall to what degree have the following factors affected your weightlifting training?

|                                          | Not at all            | Slightly              | Moderately            | Considerably          |
|------------------------------------------|-----------------------|-----------------------|-----------------------|-----------------------|
| Work demands                             | <input type="radio"/> | <input type="radio"/> | <input type="radio"/> | <input type="radio"/> |
| No access to a training facility         | <input type="radio"/> | <input type="radio"/> | <input type="radio"/> | <input type="radio"/> |
| Sport injuries                           | <input type="radio"/> | <input type="radio"/> | <input type="radio"/> | <input type="radio"/> |
| Injuries other than sport injuries       | <input type="radio"/> | <input type="radio"/> | <input type="radio"/> | <input type="radio"/> |
| Surgery                                  | <input type="radio"/> | <input type="radio"/> | <input type="radio"/> | <input type="radio"/> |
| Pregnancy                                | <input type="radio"/> | <input type="radio"/> | <input type="radio"/> | <input type="radio"/> |
| Other health challenges (Please specify) | <input type="radio"/> | <input type="radio"/> | <input type="radio"/> | <input type="radio"/> |
| Financial difficulties                   | <input type="radio"/> | <input type="radio"/> | <input type="radio"/> | <input type="radio"/> |
| Demands of other sports                  | <input type="radio"/> | <input type="radio"/> | <input type="radio"/> | <input type="radio"/> |
| Childcare                                | <input type="radio"/> | <input type="radio"/> | <input type="radio"/> | <input type="radio"/> |
| Eldercare                                | <input type="radio"/> | <input type="radio"/> | <input type="radio"/> | <input type="radio"/> |
| Other family-related issues              | <input type="radio"/> | <input type="radio"/> | <input type="radio"/> | <input type="radio"/> |
| Other challenges (Please specify)        | <input type="radio"/> | <input type="radio"/> | <input type="radio"/> | <input type="radio"/> |

**In the past two years, in total for how long have the following factors interrupted your weightlifting training?**

|                                          | No interruption       | Less than 2 weeks     | 2 weeks to 1 month    | 1 to 6 month          | 6 month to 1 year     | More than 1 year      |
|------------------------------------------|-----------------------|-----------------------|-----------------------|-----------------------|-----------------------|-----------------------|
| Work demands                             | <input type="radio"/> | <input type="radio"/> | <input type="radio"/> | <input type="radio"/> | <input type="radio"/> | <input type="radio"/> |
| No access to a training facility         | <input type="radio"/> | <input type="radio"/> | <input type="radio"/> | <input type="radio"/> | <input type="radio"/> | <input type="radio"/> |
| Sport injuries                           | <input type="radio"/> | <input type="radio"/> | <input type="radio"/> | <input type="radio"/> | <input type="radio"/> | <input type="radio"/> |
| Injuries other than sport injuries       | <input type="radio"/> | <input type="radio"/> | <input type="radio"/> | <input type="radio"/> | <input type="radio"/> | <input type="radio"/> |
| Surgery                                  | <input type="radio"/> | <input type="radio"/> | <input type="radio"/> | <input type="radio"/> | <input type="radio"/> | <input type="radio"/> |
| Pregnancy                                | <input type="radio"/> | <input type="radio"/> | <input type="radio"/> | <input type="radio"/> | <input type="radio"/> | <input type="radio"/> |
| Other health challenges (Please specify) | <input type="radio"/> | <input type="radio"/> | <input type="radio"/> | <input type="radio"/> | <input type="radio"/> | <input type="radio"/> |
| Financial difficulties                   | <input type="radio"/> | <input type="radio"/> | <input type="radio"/> | <input type="radio"/> | <input type="radio"/> | <input type="radio"/> |
| Demands of other sports                  | <input type="radio"/> | <input type="radio"/> | <input type="radio"/> | <input type="radio"/> | <input type="radio"/> | <input type="radio"/> |
| Childcare                                | <input type="radio"/> | <input type="radio"/> | <input type="radio"/> | <input type="radio"/> | <input type="radio"/> | <input type="radio"/> |
| Eldercare                                | <input type="radio"/> | <input type="radio"/> | <input type="radio"/> | <input type="radio"/> | <input type="radio"/> | <input type="radio"/> |
| Other family-related issues              | <input type="radio"/> | <input type="radio"/> | <input type="radio"/> | <input type="radio"/> | <input type="radio"/> | <input type="radio"/> |
| Other challenges (Please specify)        | <input type="radio"/> | <input type="radio"/> | <input type="radio"/> | <input type="radio"/> | <input type="radio"/> | <input type="radio"/> |

**In the past two years, to what degree did any of the following physical or psychological issues constrain/restrict your training?**

|                                                  | Not at all            | Slightly              | Moderately            | Considerably          |
|--------------------------------------------------|-----------------------|-----------------------|-----------------------|-----------------------|
| Shoulders                                        | <input type="radio"/> | <input type="radio"/> | <input type="radio"/> | <input type="radio"/> |
| Back                                             | <input type="radio"/> | <input type="radio"/> | <input type="radio"/> | <input type="radio"/> |
| Hips                                             | <input type="radio"/> | <input type="radio"/> | <input type="radio"/> | <input type="radio"/> |
| Knees                                            | <input type="radio"/> | <input type="radio"/> | <input type="radio"/> | <input type="radio"/> |
| Other joints                                     | <input type="radio"/> | <input type="radio"/> | <input type="radio"/> | <input type="radio"/> |
| Anxiety                                          | <input type="radio"/> | <input type="radio"/> | <input type="radio"/> | <input type="radio"/> |
| Depression                                       | <input type="radio"/> | <input type="radio"/> | <input type="radio"/> | <input type="radio"/> |
| Stress                                           | <input type="radio"/> | <input type="radio"/> | <input type="radio"/> | <input type="radio"/> |
| Trouble sleeping                                 | <input type="radio"/> | <input type="radio"/> | <input type="radio"/> | <input type="radio"/> |
| Cardiovascular                                   | <input type="radio"/> | <input type="radio"/> | <input type="radio"/> | <input type="radio"/> |
| Cancer                                           | <input type="radio"/> | <input type="radio"/> | <input type="radio"/> | <input type="radio"/> |
| Diabetes                                         | <input type="radio"/> | <input type="radio"/> | <input type="radio"/> | <input type="radio"/> |
| Autoimmune diseases                              | <input type="radio"/> | <input type="radio"/> | <input type="radio"/> | <input type="radio"/> |
| Respiratory illnesses and diseases               | <input type="radio"/> | <input type="radio"/> | <input type="radio"/> | <input type="radio"/> |
| Digestive disorder and Gastrointestinal diseases | <input type="radio"/> | <input type="radio"/> | <input type="radio"/> | <input type="radio"/> |
| Other chronic health issues                      | <input type="radio"/> | <input type="radio"/> | <input type="radio"/> | <input type="radio"/> |
| Menstruation                                     | <input type="radio"/> | <input type="radio"/> | <input type="radio"/> | <input type="radio"/> |
| Peri/Menopause symptoms                          | <input type="radio"/> | <input type="radio"/> | <input type="radio"/> | <input type="radio"/> |

Display The question “Have you experienced menopause (no menstruation for a year)?” if selected “Female”, or “Transgender”, or “Intersex”, or “Other” in question “What is the gender that you identify with?”

**Have you experienced menopause (no menstruation for a year)?**

- No
- Yes
- Not applicable

**Display Question “Please tell us the age when you reached menopause (no menstruation for a year)” if select Yes for question “Have you experienced menopause (no menstruation for a year)?”**

**Please tell us the age when you reached menopause (no menstruation for a year).**

---

**Display Question “Which peri/menopausal symptoms have disrupted your training or competing in weightlifting? Please check all that apply.” if select Yes for question “Have you experienced menopause (no menstruation for a year)?”**

**Which peri/menopausal symptoms have disrupted your training or competing in weightlifting? Please check all that apply.**

- Hot flashes
- Fatigue
- Trouble sleeping
- Mood swings
- Weight gain and slowed metabolism
- Other (18) \_\_\_\_\_

### **Comments**

Your responses will help us better understand the factors that affect masters weightlifting performance, and how this varies for different individuals.

**With your permission, we would like to connect the responses of this questionnaire to your performance trajectories. If you are willing, please provide your USAW number below.**

- Yes (Please provide your USAW number)
- No

**Do you have any additional comments about the factors affecting your weightlifting career?**

---

**Do you have any comments about how your weightlifting career affects parts of your life?**

---
